# Supplementary material for: Pathogenic CANVAS-causing but not nonpathogenic RFC1 DNA/RNA repeat motifs form quadruplex or triplex structures
Source: PubMed Central journal article supplement (PMC10563062; doi:10.1016/j.jbc.2023.105202), 2023-09-01

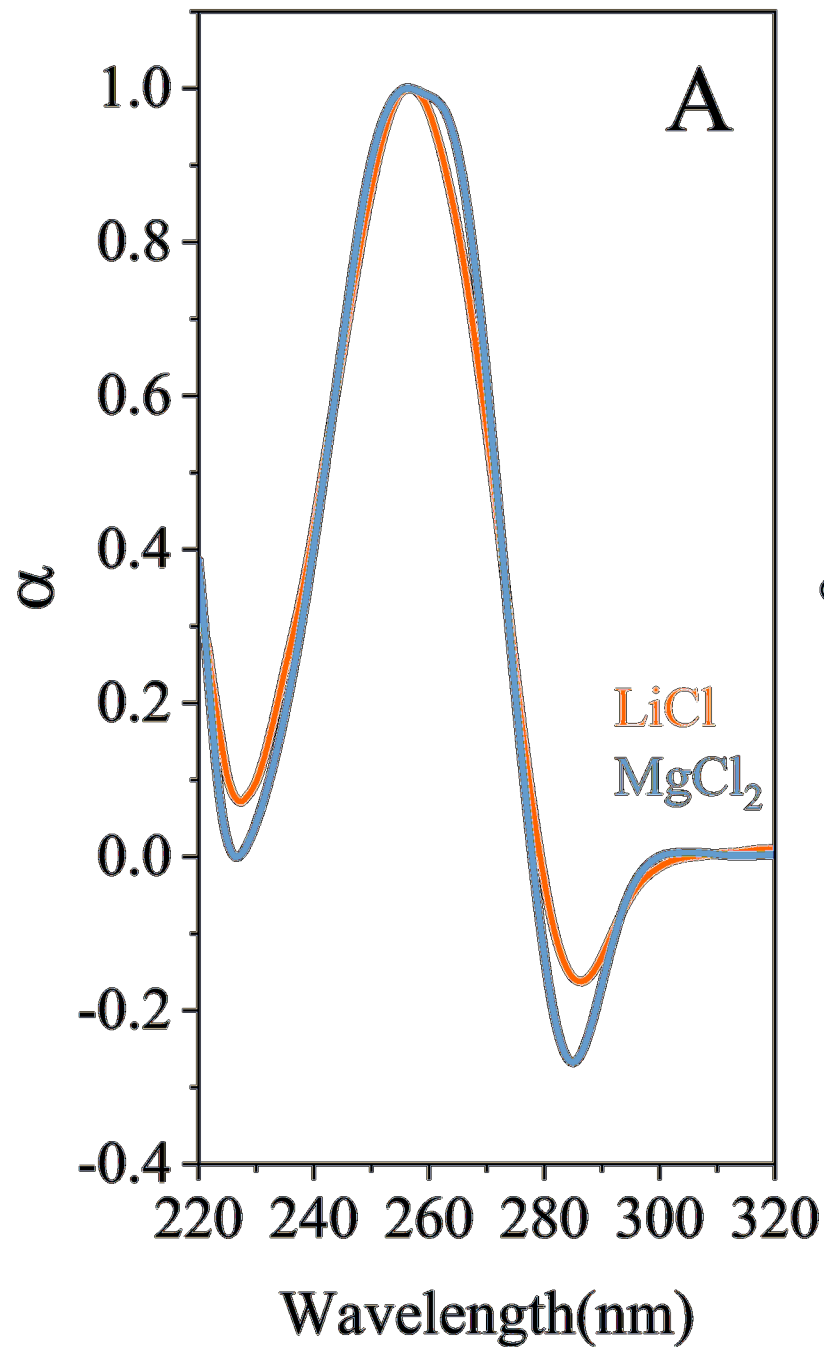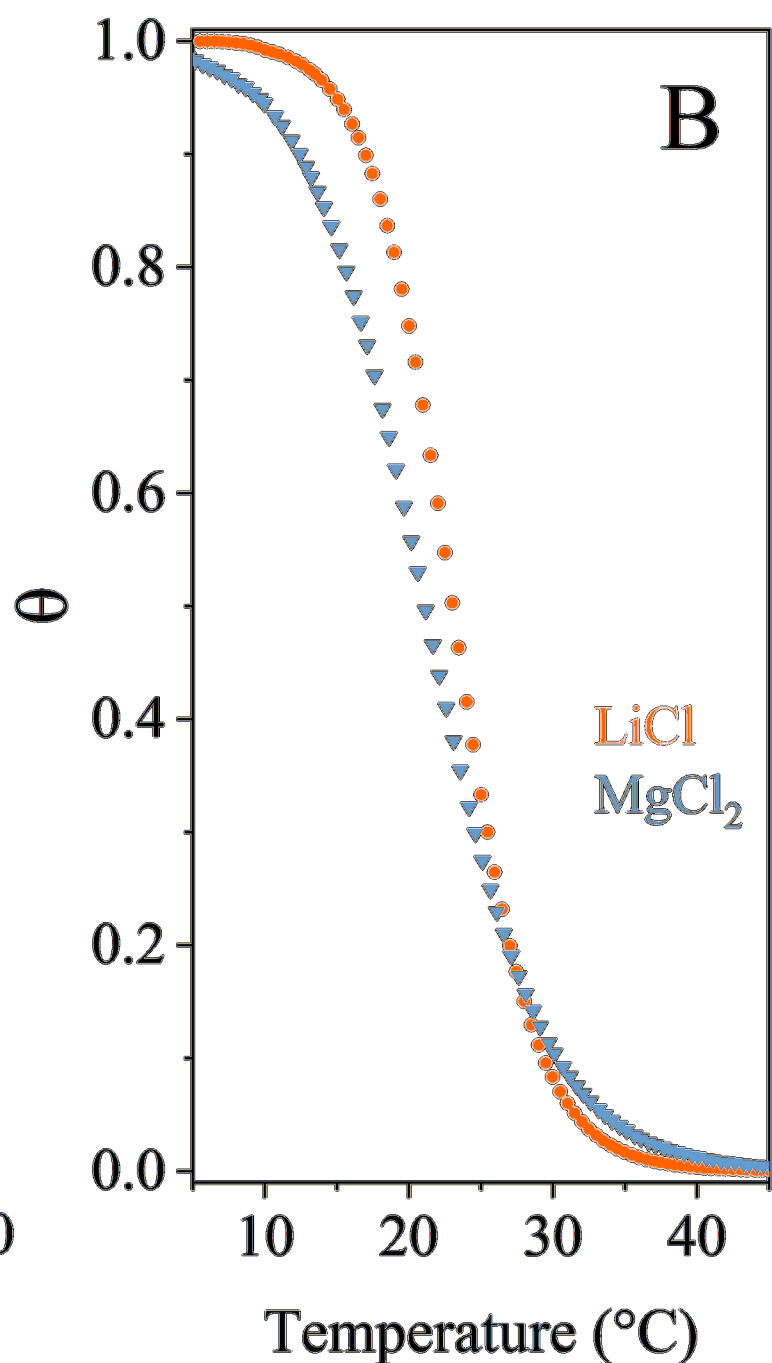

Supplement: mmc2.pdf [file mmc2.pdf]
